# Supplementary material
Source: PubMed Central journal article supplement (PMC4767336)
Supplement: JCI83470.sd.pdf [file JCI83470.sd.pdf]

# Supplemental Figure 1

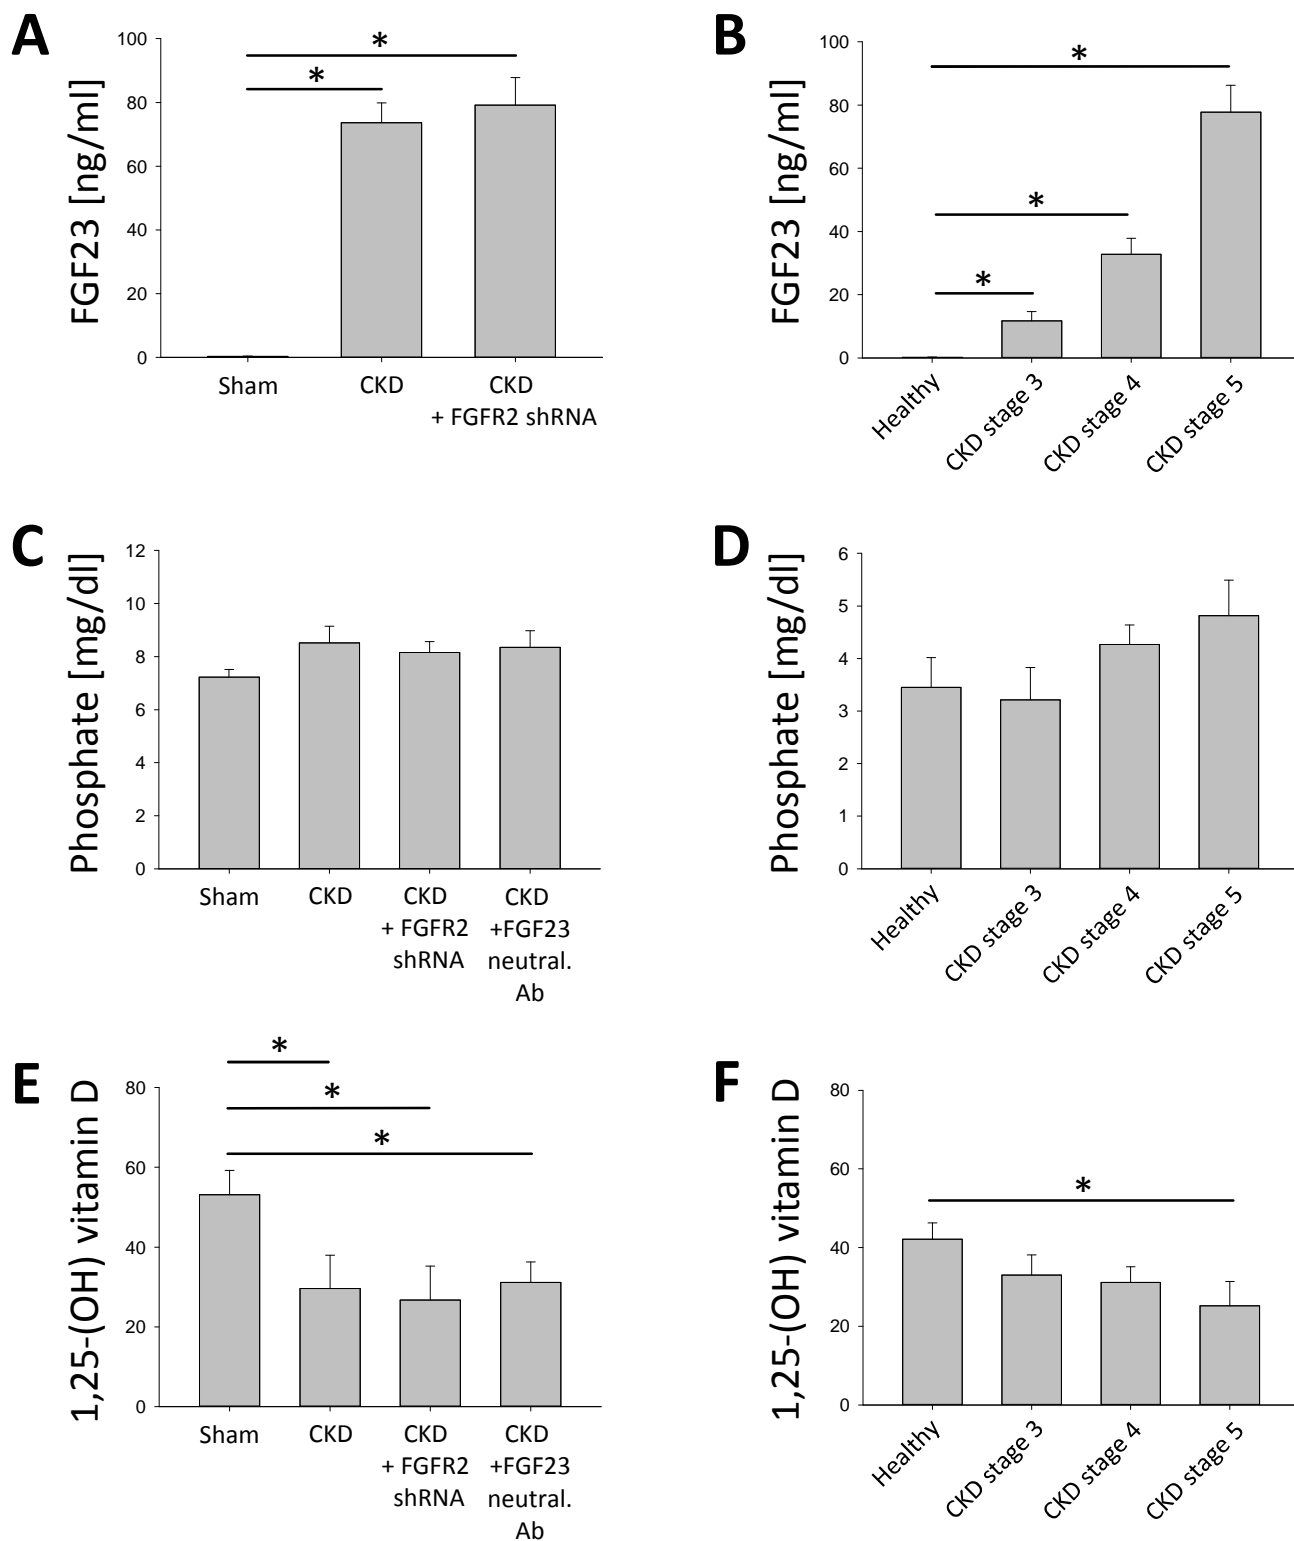

Supplemental Figure 1: **Serum FGF23, phosphate and 1,25(OH)vitamin D levels in mice and patients.** FGF23 serum levels in **(A)** mice (n=4) and **(B)** patients (n=8-13). Phosphate serum levels in **(C)** mice (n=4) and **(D)** patients (n=8-13). 1,25(OH) vitamin D serum levels in **(E)** mice (n=4) and **(F)** patients (n=8-13). \* p < 0.05, ANOVA plus Bonferroni testing.

## Supplemental Figure 2

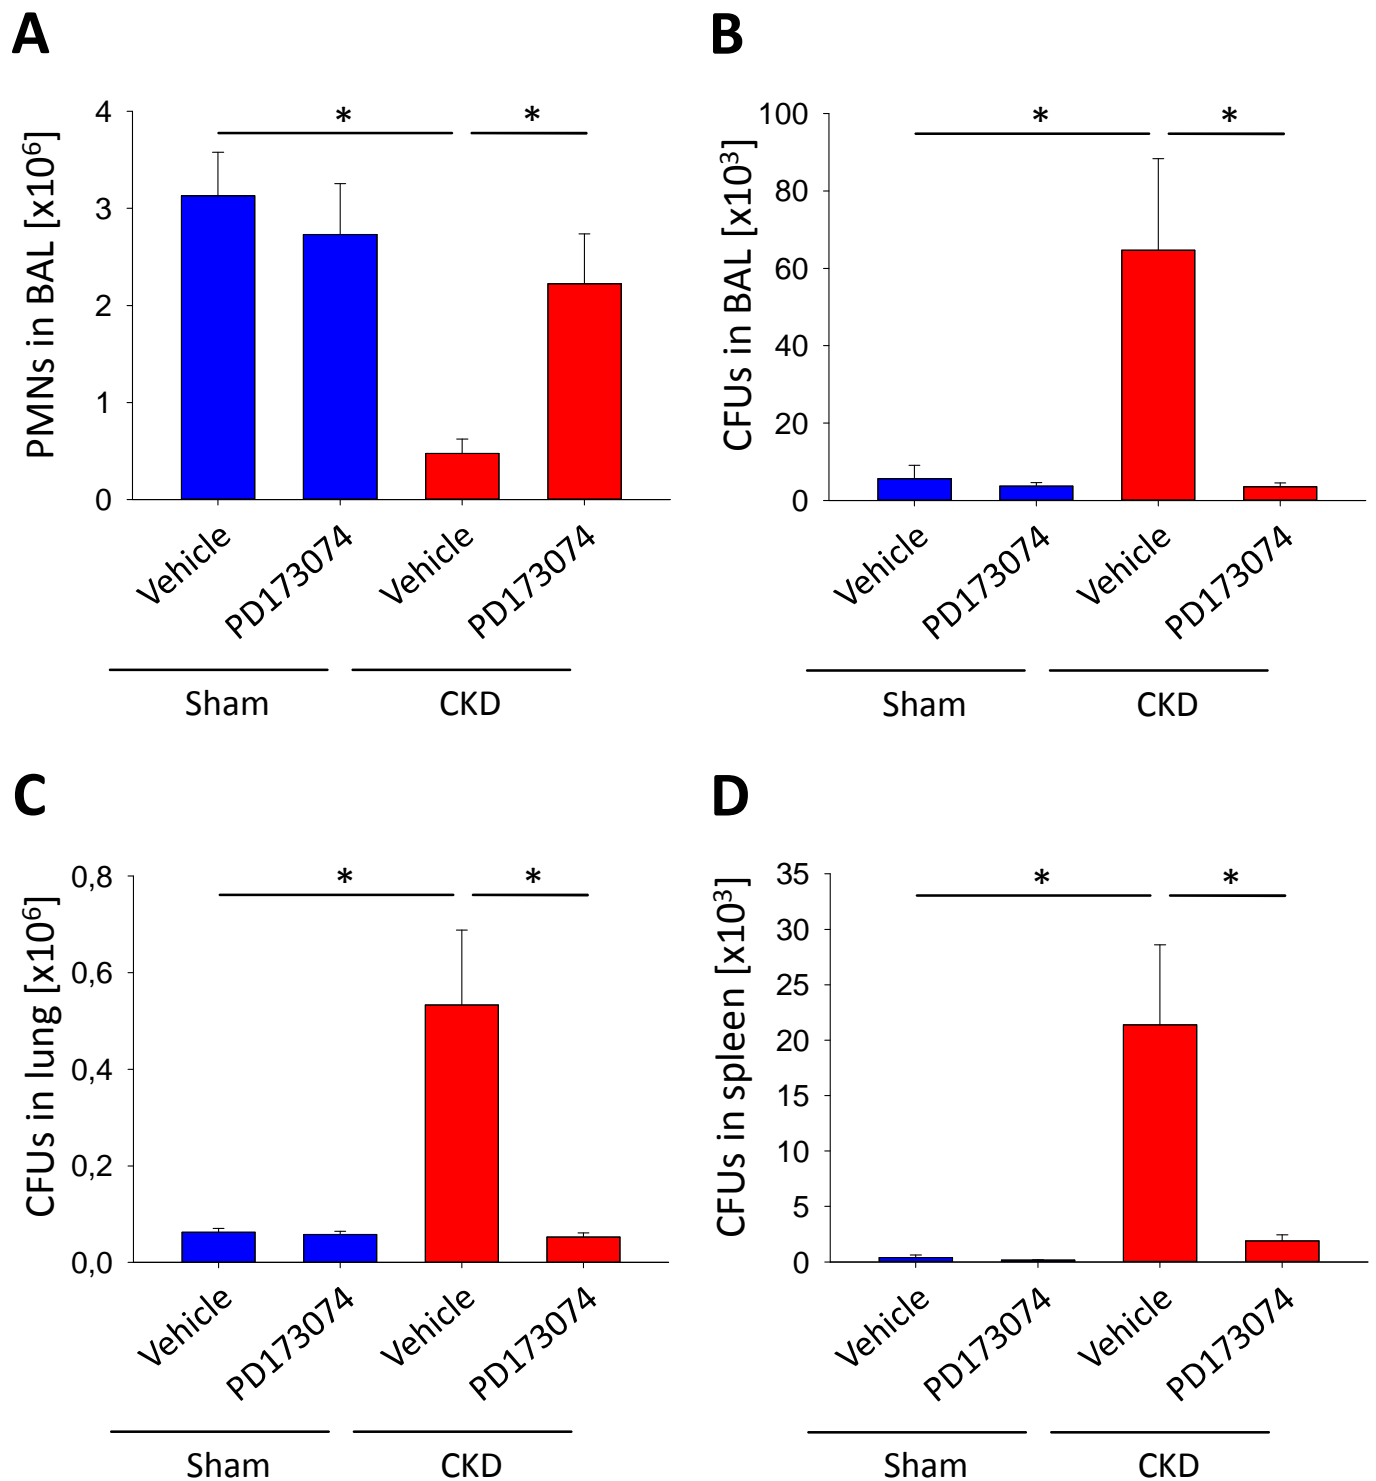

Supplemental Figure 2: **pan-FGF receptor blockade alleviates pneumonia in CKD mice.** Pneumonia was induced in CKD mice and sham-operated mice which received either the pan-FGF receptor antagonist PD173074 or vehicle control. After 24 hours, neutrophils were counted in the BAL (**A**) and CFUs were analysed in the BAL (**B**), lung tissue (**C**) and spleen (**D**) (n=4). \*  $p < 0.05$ , ANOVA plus Bonferroni testing.

## Supplemental Figure 3

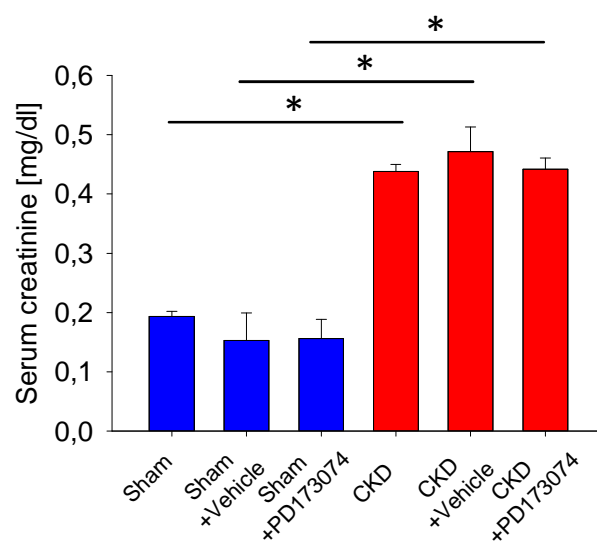

Supplemental Figure 3: **Serum creatinine levels in sham and CKD mice.** 5/6-nephrectomy or sham-operation was performed in WT mice and serum creatinine levels were analysed after 10 day (n=4). \*  $p < 0.05$ , ANOVA plus Bonferroni testing.

# Supplemental Figure 4

A

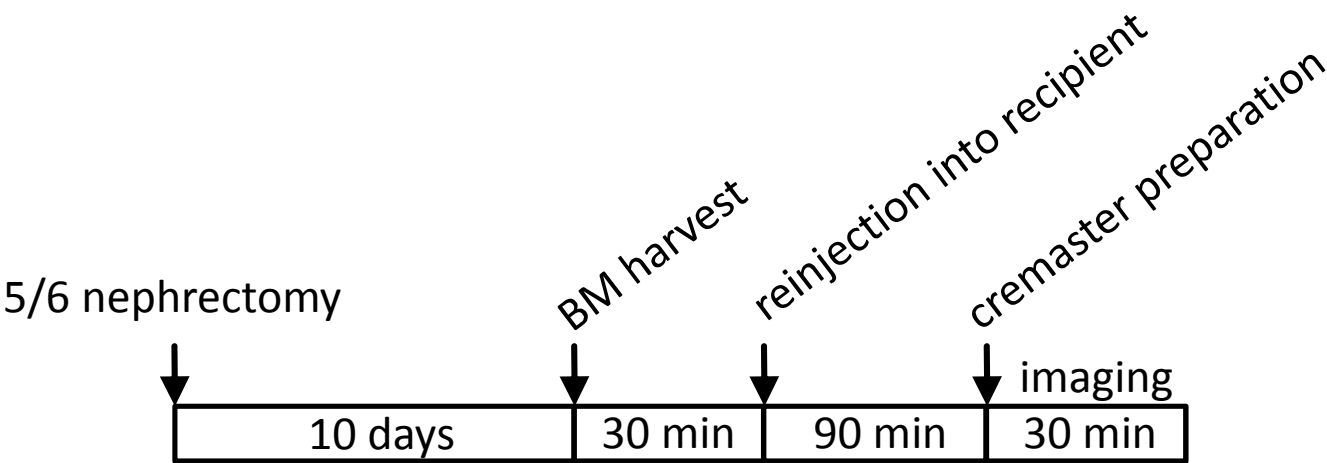

Supplemental Figure 4. (A) Timeline of adoptive transfer experiments.

## Supplemental Figure 5

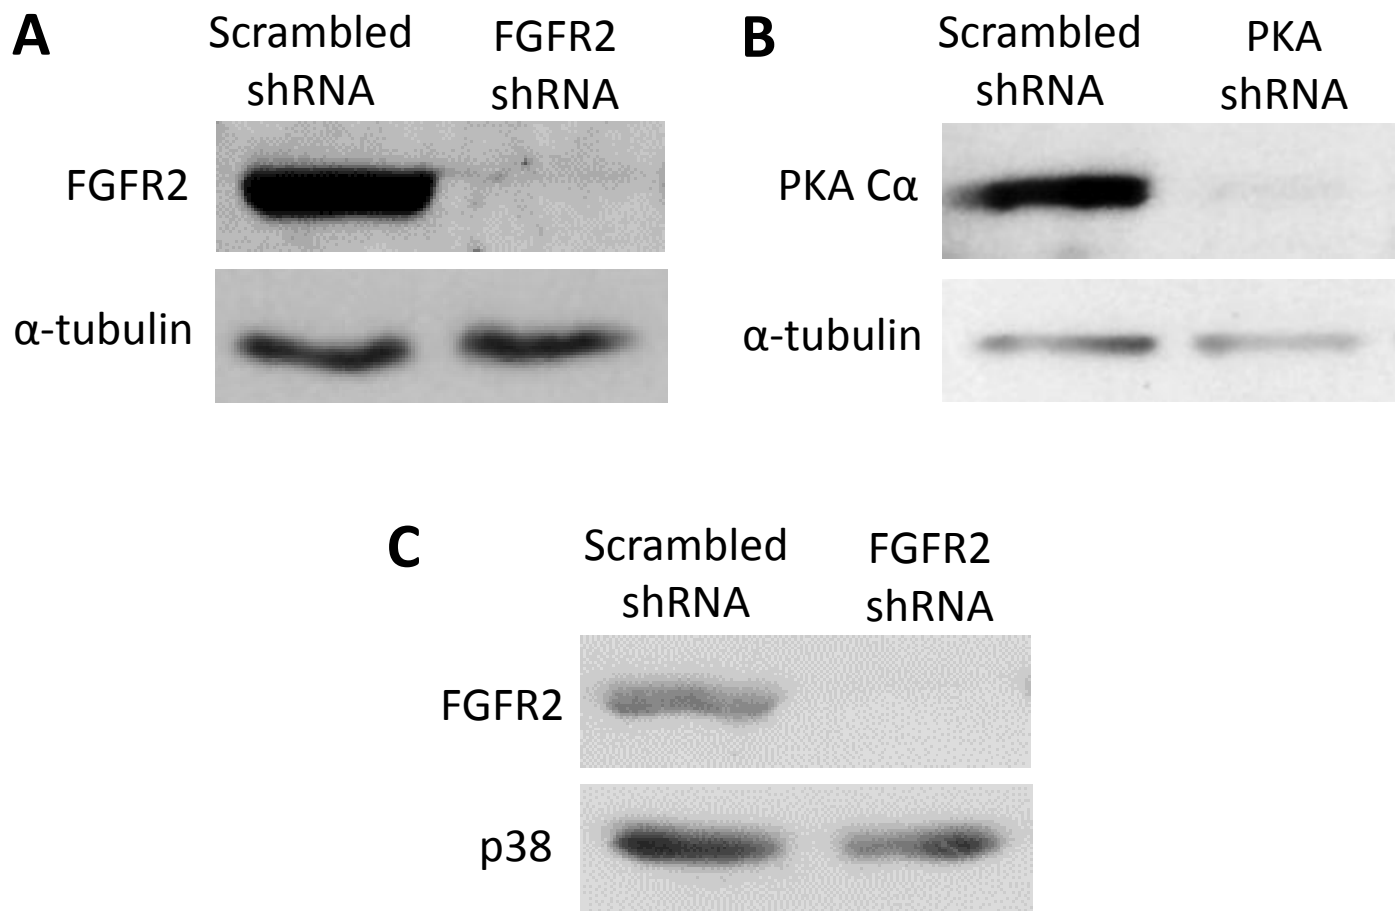

Supplemental Figure 5: **FGFR2 and PKA knockdown in HL60 cells.** FGFR2 or PKA was knocked down in HL60 cells by lentiviral transfection. **(A)** FGFR2 knockdown and **(B)** PKA knockdown was verified by western blotting (exemplary blots from 4 experiments). **(C)** FGFR2 knockdown in murine neutrophils after retroviral transduction *in vivo* (exemplary blots from 4 experiments).

## Supplemental Figure 6

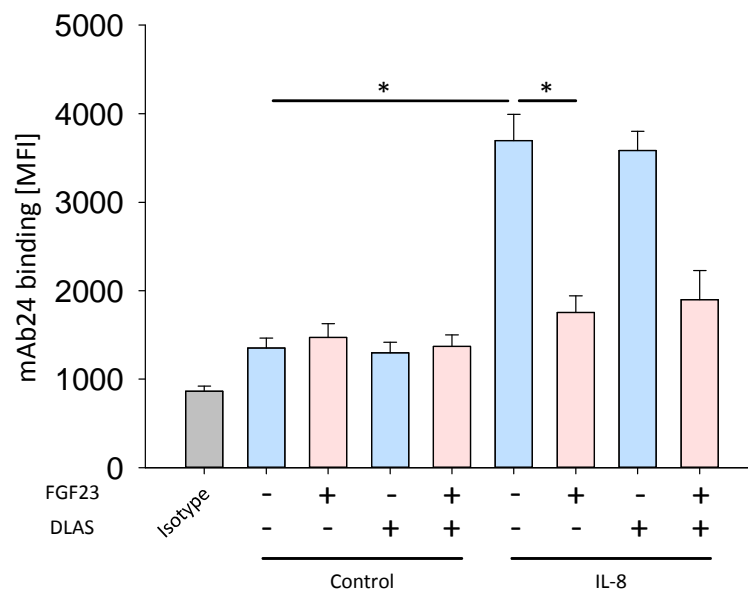

Supplemental Figure 6: **FGF23 inhibits integrin activation independent of  $\alpha$ -Klotho.** Isolated human neutrophils were pretreated with or without FGF23 (100 ng/ml) and/or D-saccharid acid 1,4-lactone monohydrate (DLAS, 10 $\mu$ M) for 30 minutes and stimulated with IL-8 (100 ng/ml) at 37°C for 5 minutes and binding of the reporter antibody mAb24 was assessed by flow cytometry (n=4). \* p < 0.05, ANOVA plus Bonferroni testing.

## Supplemental Figure 7

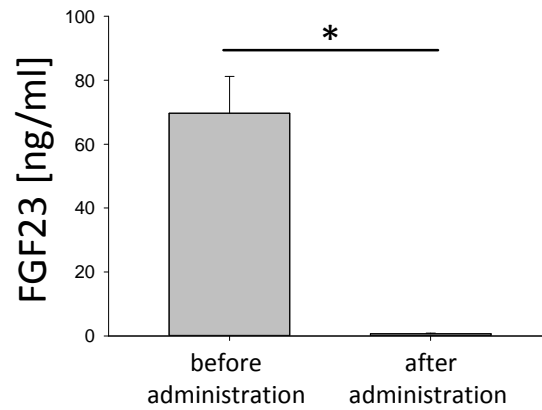

Supplemental Figure 7: **Serum FGF23 levels in CKD mice before and after administration of FGF23-neutralizing antibody.** CKD was induced in WT mice and FGF23 serum levels were measured before and after administration of a FGF23-neutralizing antibody (3 mg/kg body weight, n=4). \*  $p < 0.05$ , Wilcoxon-test.

## Supplemental Figure 8

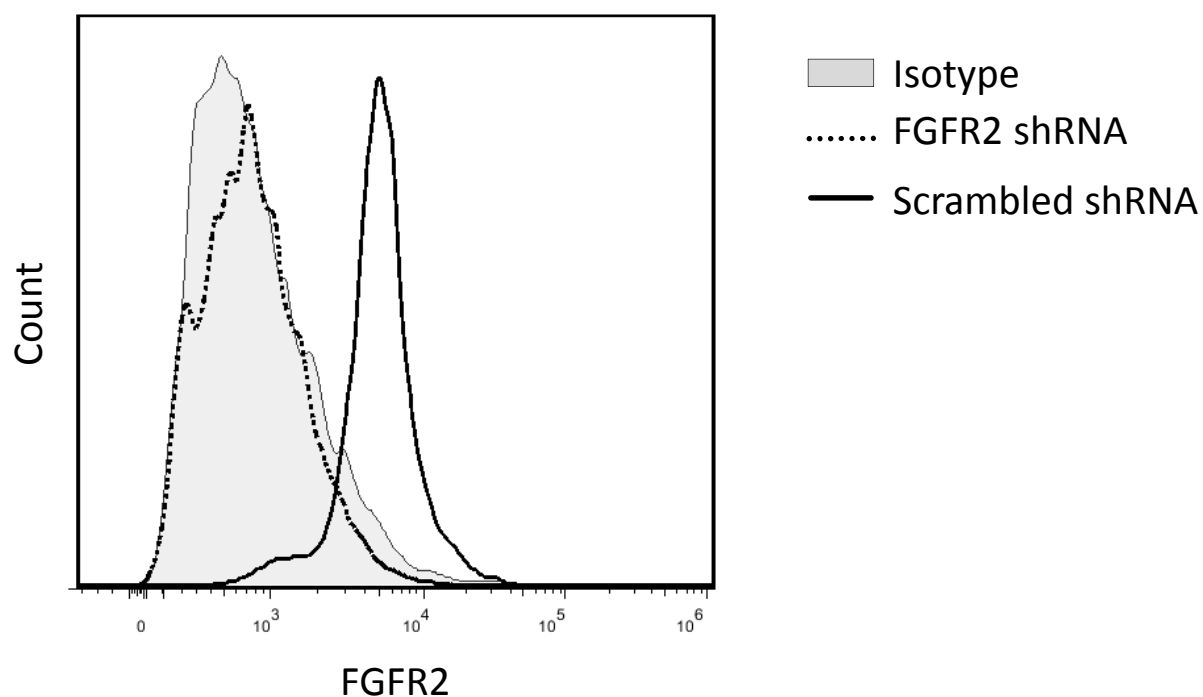

Supplemental Figure 8: **FGFR2 expression on neutrophils after retroviral transduction.** Lethally irradiated WT mice were transplanted with hematopoietic stem cells that had been retrovirally transduced with FGFR2 or scrambled shRNA. FGFR2 expression of CD45<sup>+</sup>/Ly6G<sup>+</sup> neutrophils was analyzed by flow cytometry. Shaded grey histogram represents isotype control, dotted line represents FGFR2 expression of FGFR2 knockdown mice and solid line represents control mice. (n > 5000 cells per condition). \* p < 0.05
